# Supplementary material for: Revealing Unseen Wounds: A Cluster Analysis of Psychological and Pandemic-Driven Factors Associated with Self-Injury Among Global Students
Source: Research Square preprint supplement (doi:10.21203/rs.3.rs-7144448/v1), 2025-09-09
Supplement: Supplementary file 1 [file 527c2b75750776742d0fc300.docx]

**Supplementary Figure S1. Distribution of Countries for the Studying Abroad Students’ Group.** In this study, about 47% of the sample were currently active students in Taiwan, and the majority communicated with their peer groups in Taiwan, given the study's sampling technique. The sample also included 13% of participants from Japan, 6% from South Korea, 9% from Malaysia and Mainland China, 5% from Thailand, 3% from the United Kingdom, 4% from Malaysia, 2% from Turkey, and 1% from Singapore, Switzerland, the Philippines, Germany, Hungary, Ireland, and the United States.

**Supplementary Table S1.** Full (below the diagonal) and partial (above the diagonal) correlation matrices between measured variables are illustrated, with warmer colors denoting positive correlations and cooler colors denoting negative correlations among the domestic group of postgraduate students (n=193).

**Supplementary Table S2.** Full (below the diagonal) and partial (above the diagonal) correlation matrices between measured variables are illustrated, with warmer colors denoting positive correlations and cooler colors denoting negative correlations among the international group of postgraduate students (n=193).
